# Supplementary material for: A survey on exponential random graph models: an application perspective
Source: PeerJ journal article supplement (doi:10.7717/peerj-cs.269), 2020-04-06

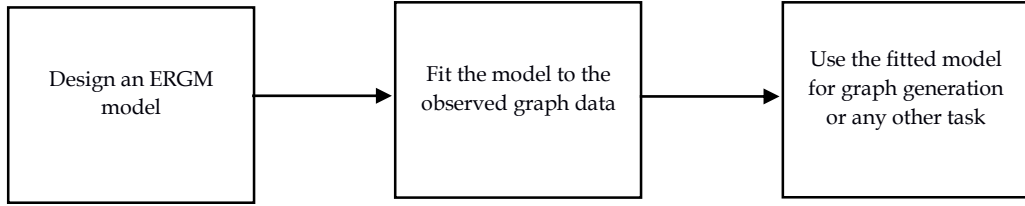

Supplement: S-figure_1.pdf [file S-figure_1.pdf]
