# Supplementary material for: A survey on exponential random graph models: an application perspective
Source: PeerJ journal article supplement (doi:10.7717/peerj-cs.269), 2020-04-06
Supplement: S-figure_2.pdf [file S-figure_2.pdf]

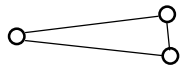

1-triangle

(a)

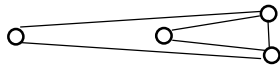

2-triangle

(b)

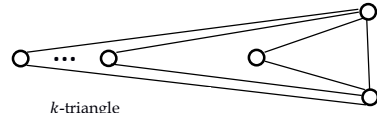

$k$ -triangle

(c)
